# Supplementary material for: Exploring Molecular Signs of Sex in the Marine Diatom Skeletonema marinoi
Source: MDPI journal article supplement (doi:10.3390/genes10070494), 2019-06-28
Supplement: s1 [file s1]

|    | Cell size | Time | Treatment                                   |   |                       |
|----|-----------|------|---------------------------------------------|---|-----------------------|
| 1  | Large     | T1   | Large cells                                 | } | Salt stress (SALT_T1) |
| 2  | Large     | T1   | Large cells                                 |   |                       |
| 3  | Large     | T1   | Large cells + salt stress                   | } | Sex_T1                |
| 4  | Large     | T1   | Large cells + salt stress                   |   |                       |
| 5  | Small     | T1   | Small cells + salt stress $\Rightarrow$ sex | } | Sex_T1                |
| 6  | Small     | T1   | Small cells + salt stress $\Rightarrow$ sex |   |                       |
| 7  | Small     | T1   | Small cells + salt stress $\Rightarrow$ sex |   |                       |
| 8  | Large     | T2   | Large cells                                 | } | Salt stress (SALT_T2) |
| 9  | Large     | T2   | Large cells                                 |   |                       |
| 10 | Large     | T2   | Large cells + salt stress                   | } | Sex_T2                |
| 11 | Large     | T2   | Large cells + salt stress                   |   |                       |
| 12 | Small     | T2   | Small cells + salt stress $\Rightarrow$ sex | } | Sex_T2                |
| 13 | Small     | T2   | Small cells + salt stress $\Rightarrow$ sex |   |                       |
| 14 | Small     | T2   | Small cells + salt stress $\Rightarrow$ sex |   |                       |

**Supplementary Figure 1.** Schematic representation of the comparisons made between samples in the differential expression analysis.

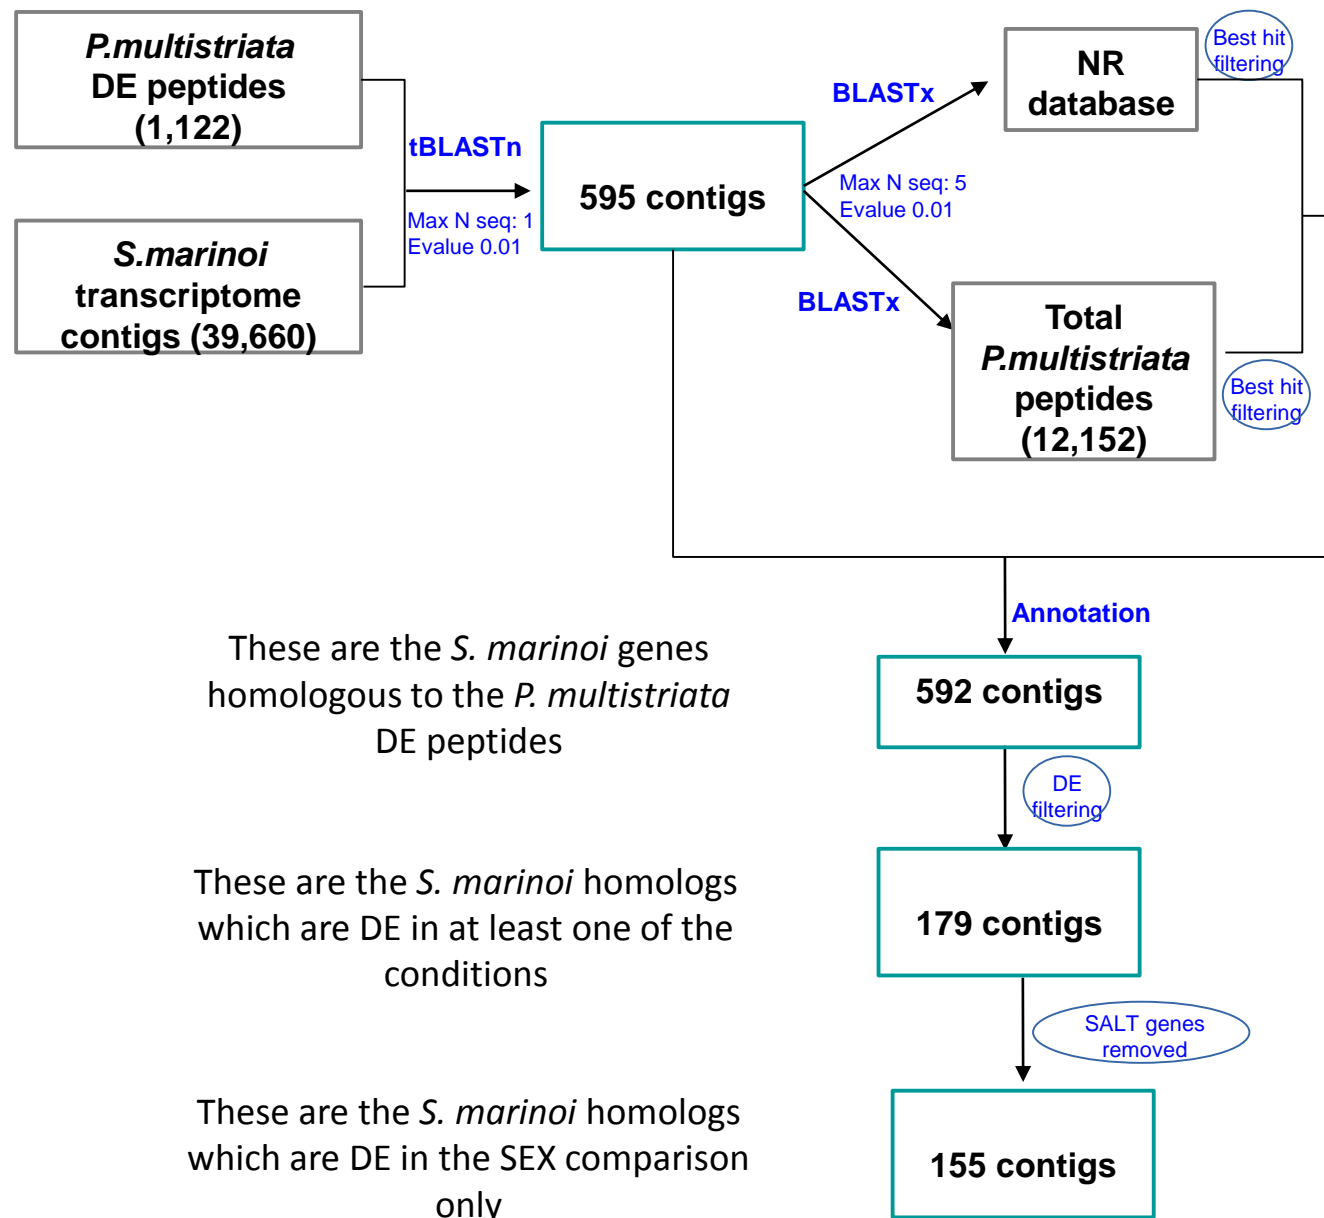

**Supplementary Figure S2.** Scheme of the workflow for the identification of *S. marinoi* transcripts homologous to *P. multistriata* sex-related genes (Basu et al., 2017) which are differentially expressed in the SEX condition. See Methods for details.

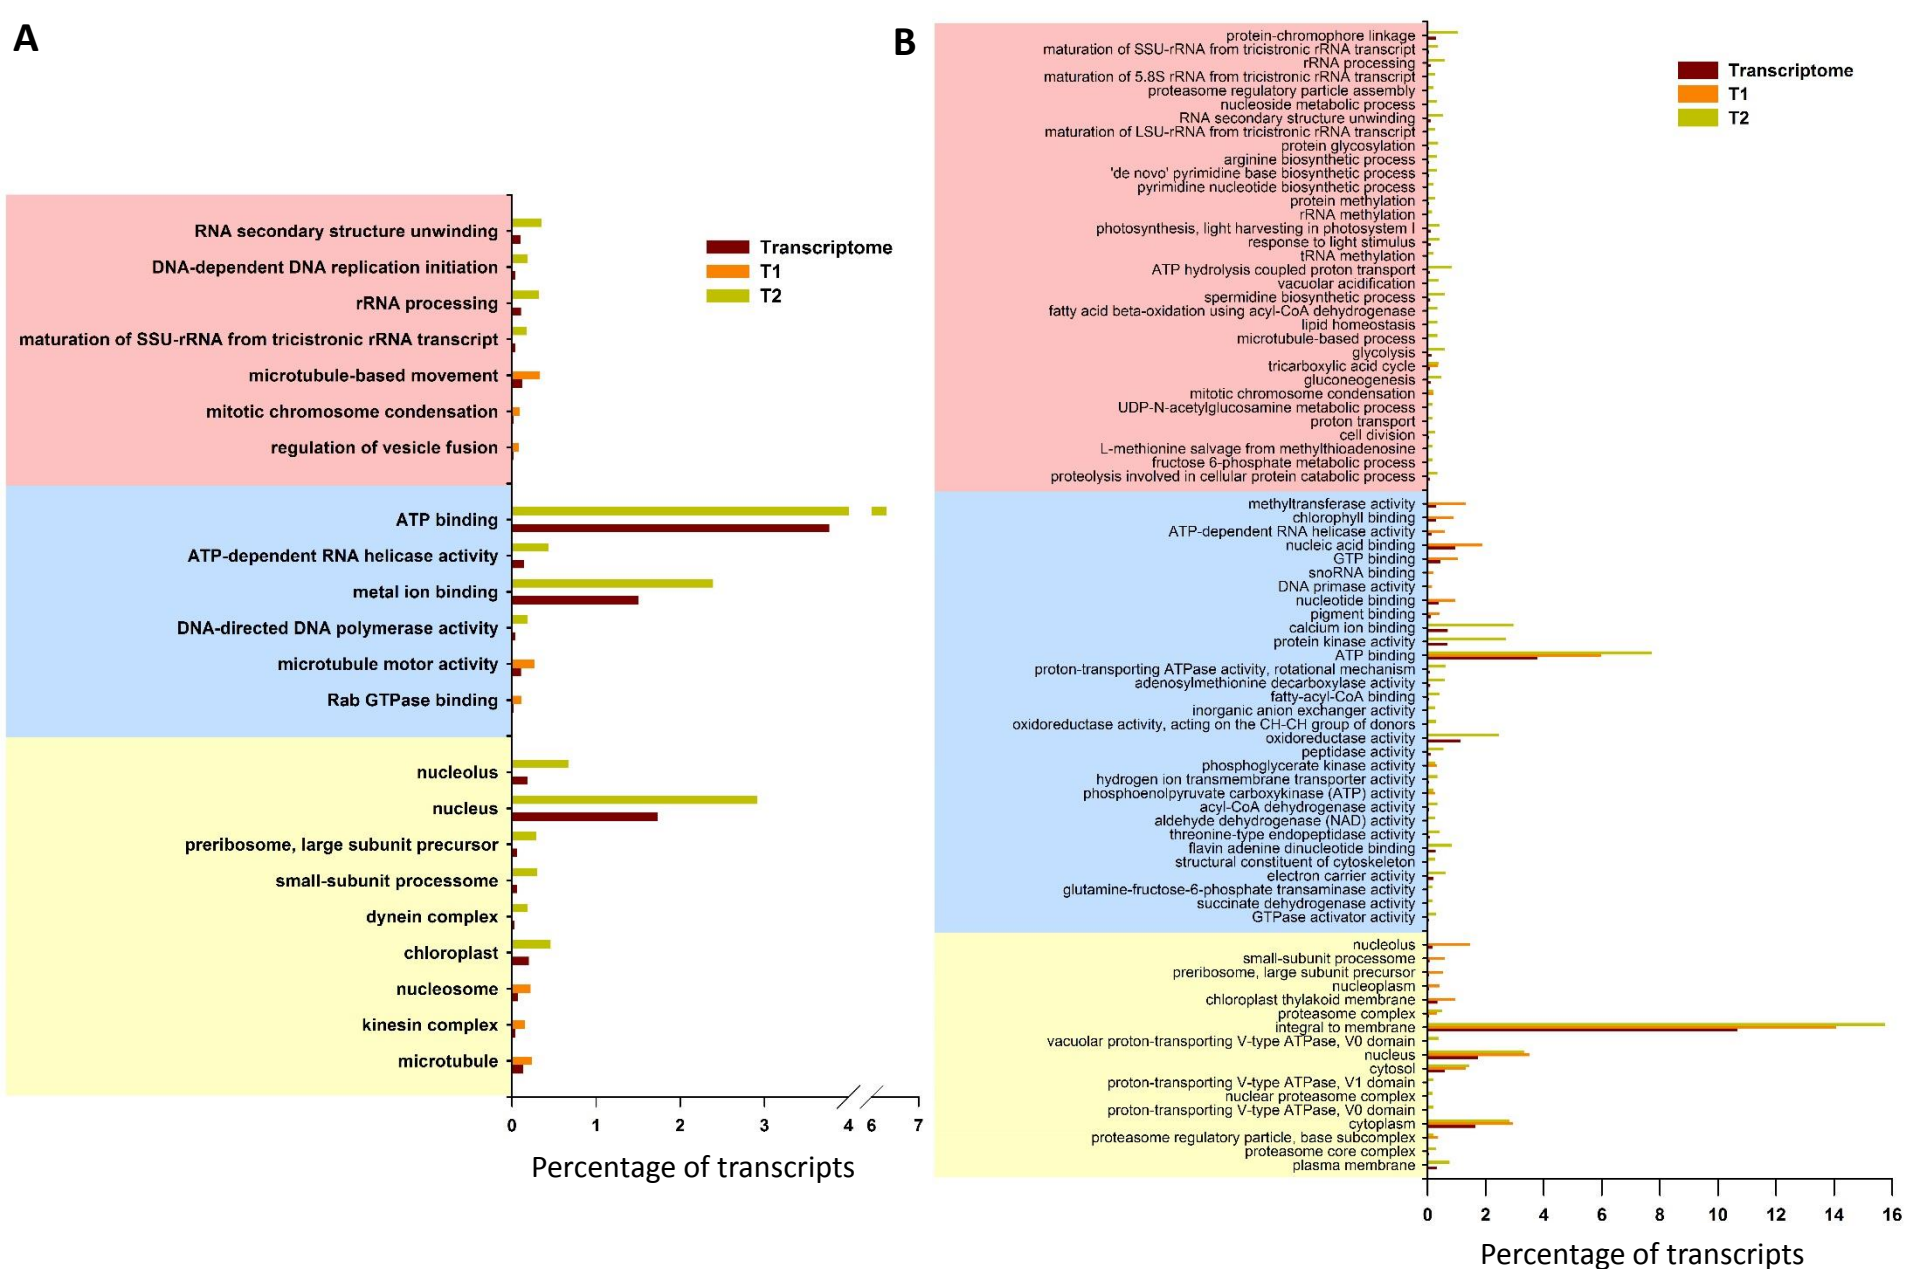

**Supplementary Figure S3.** Enriched GO terms for *S. marinoi* SEX (A) and SALT (B) differentially expressed genes. The pink shade highlights the Biological Process, the blue shade the Molecular Function and the yellow shade the Cellular Component categories.
